# Supplementary material for: Inactivated Eyedrop Influenza Vaccine Adjuvanted with Poly(I:C) Is Safe and Effective for Inducing Protective Systemic and Mucosal Immunity
Source: PubMed Central journal article supplement (PMC4565664; doi:10.1371/journal.pone.0137608), 2015-09-10

S1 Fig. Long-term Ag-specific Ab production induction in eyedrop vaccinated mice.

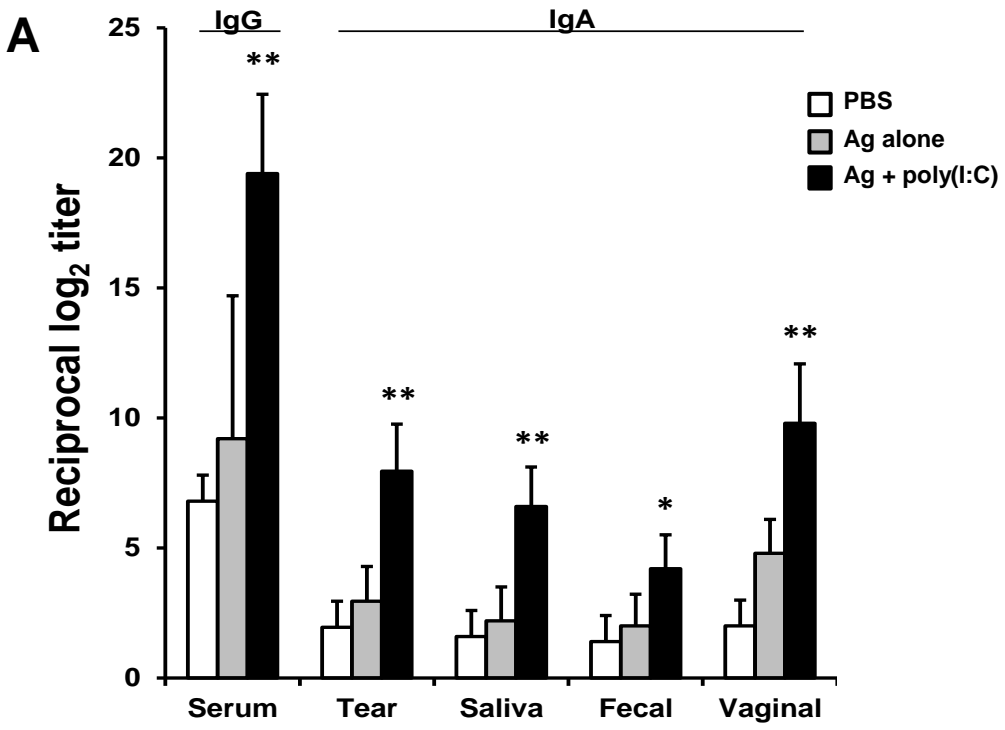

Supplement: pone.0137608.s001.pdf [file pone.0137608.s001.pdf]
